# Supplementary material for: Optical role of the thin metal layer in a TiOx/Ag/TiOx transparent and conductive electrode for organic solar cells
Source: Royal Society of Chemistry journal article supplement (doi:10.1039/c6ra22081a), 2016-01-01
Supplement: c6ra22081a1.pdf [file c6ra22081a1.pdf]

# Optical Role of the Thin Metal Layer in $\text{TiO}_x/\text{Ag}/\text{TiO}_x$ Transparent and Conductive Electrode for Organic Solar Cells

Adrien Bou<sup>a,c</sup>, Malika Chalh<sup>b</sup>, Sylvain Vedraïne<sup>b</sup>, Bruno Lucas<sup>b</sup>, Damien Barakel<sup>a</sup>, Léo

Peres<sup>a</sup>, Pierre-Yves Thoulon<sup>c</sup>, Marc Ricci<sup>c</sup> and Philippe Torchio<sup>a\*</sup>

<sup>a</sup> Aix-Marseille University, IM2NP, CNRS-UMR 7334, Domaine Universitaire de Saint-Jérôme, Service 231, 13 397 Marseille Cedex 20, France

<sup>b</sup> Limoges University, Institut XLIM, CNRS-UMR 7252, Université de Limoges, 123 avenue Albert Thomas, 87 060 Limoges, France

<sup>c</sup> CROSSLUX, Immeuble CCE, Avenue Georges Vacher, ZI Rousset Peynier, 13 106 Rousset Cedex, France

\*philippe.torchio@univ-amu.fr

## Supplementary Information

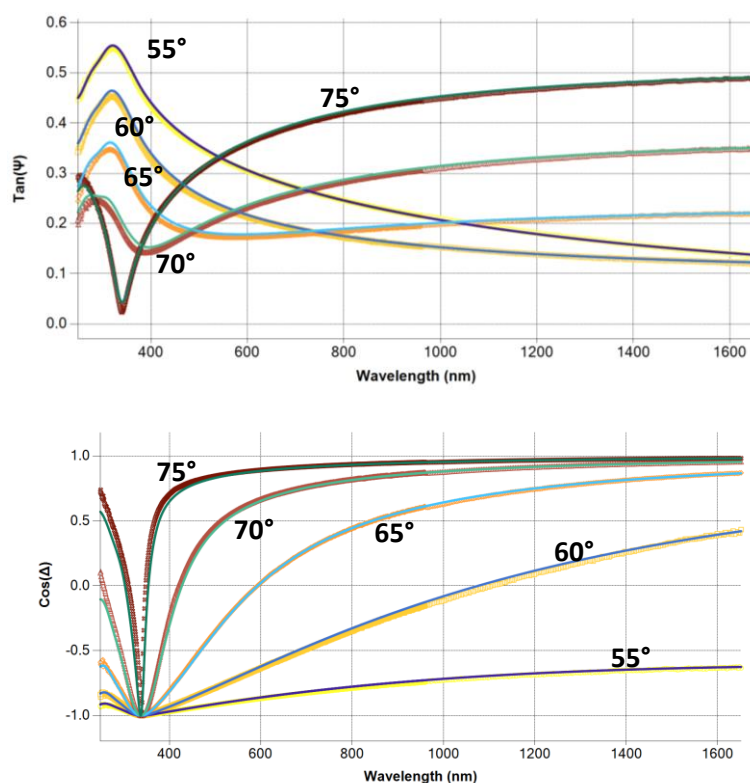

Figure S1- Comparison of the measured and obtained from an ellipsometric model (mixed of Tauc-Lorentz and Gauss laws) values of  $\tan(\Psi)$  (top) and  $\cos(\Delta)$  (bottom) for a sample of 32 nm of  $\text{TiO}_x$  deposited on glass versus the electromagnetic spectra [250-1650] nm for five different incident angles (55° to 75°).

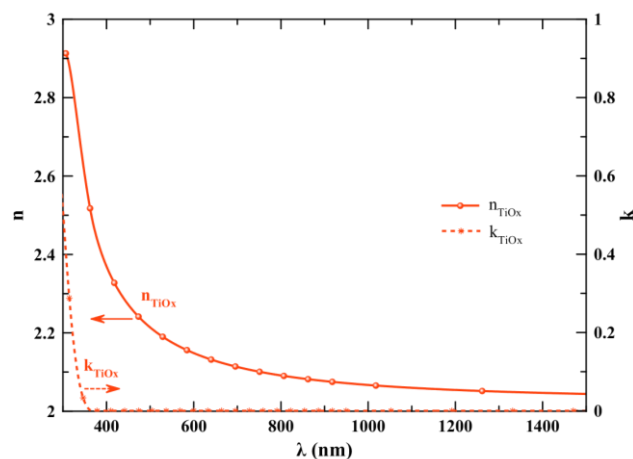

Figure S2- Optical constants  $n$  (left y-axis) and  $k$  (right y-axis) of the titanium dioxide versus wavelength.

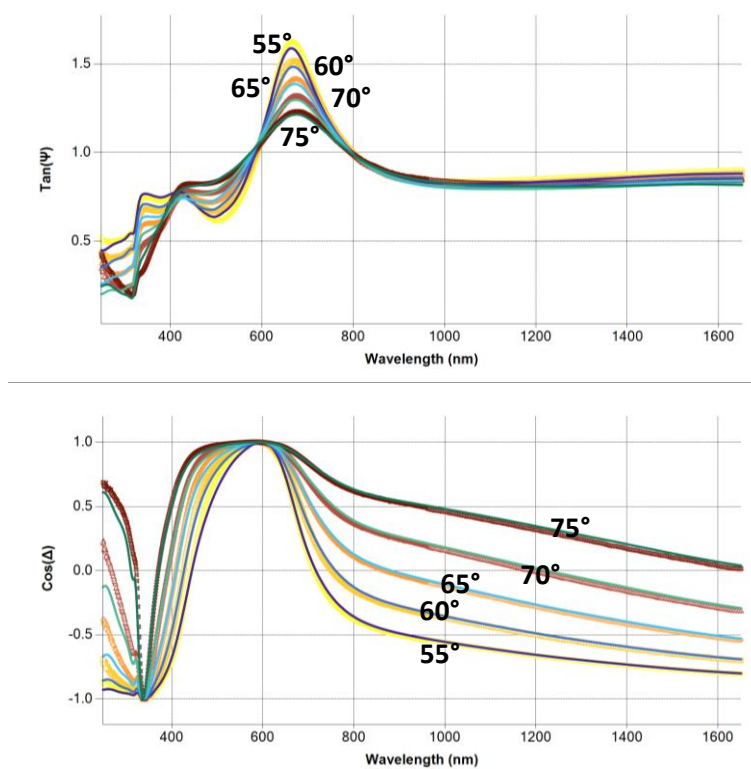

Figure S3- Comparison of the measured and obtained from an ellipsometric model values of  $\tan(\Psi)$  (top) and  $\cos(\Delta)$  (bottom) for a Glass |  $\text{TiO}_x$  (37 nm) | Ag (13 nm) |  $\text{TiO}_x$  (42 nm) sample versus the electromagnetic spectra [250-1650] nm for five different incident angles ( $55^\circ$  to  $75^\circ$ ).

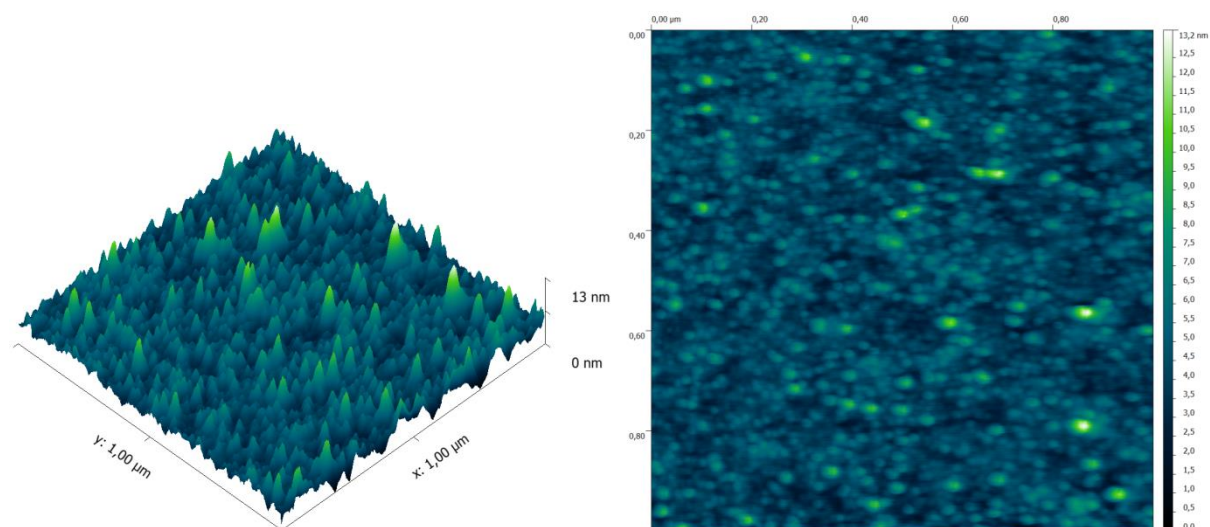

Figure S4- 2D (right) and 3D (left) images of the surface roughness of a 32 nm-thick monolayer of  $\text{TiO}_x$  deposited on glass with a RMS roughness of 1.14 nm.

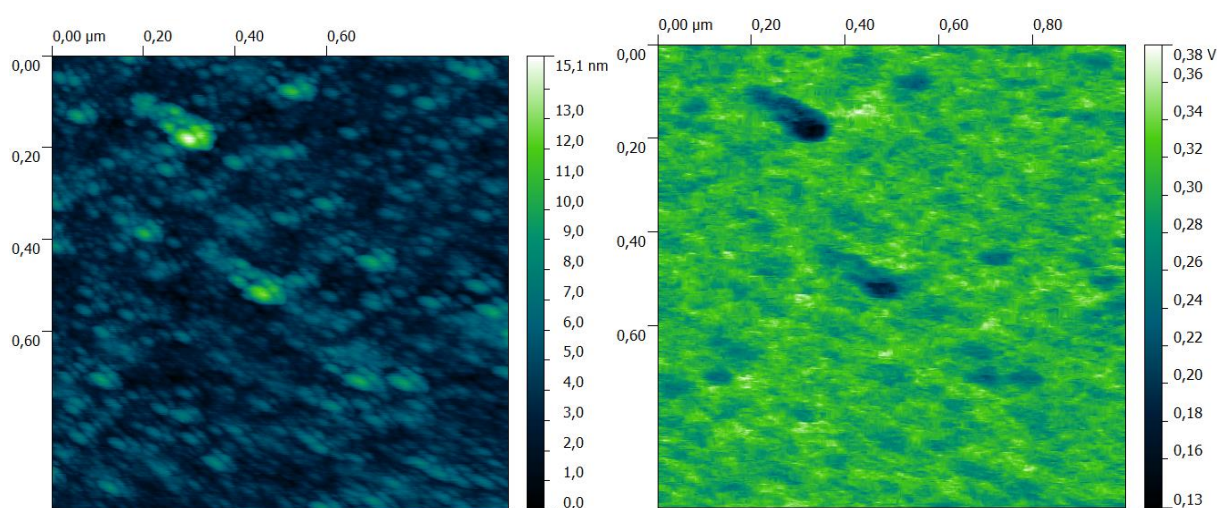

Figure S5- 2D images of the surface roughness (left) and surface potential (right) for the Glass |  $\text{TiO}_x$  (37 nm) | Ag (13 nm) |  $\text{TiO}_x$  (42 nm) sample (same as Figure S3 and S6) with a RMS roughness of 1.58 nm and a work function of 4.55 eV.

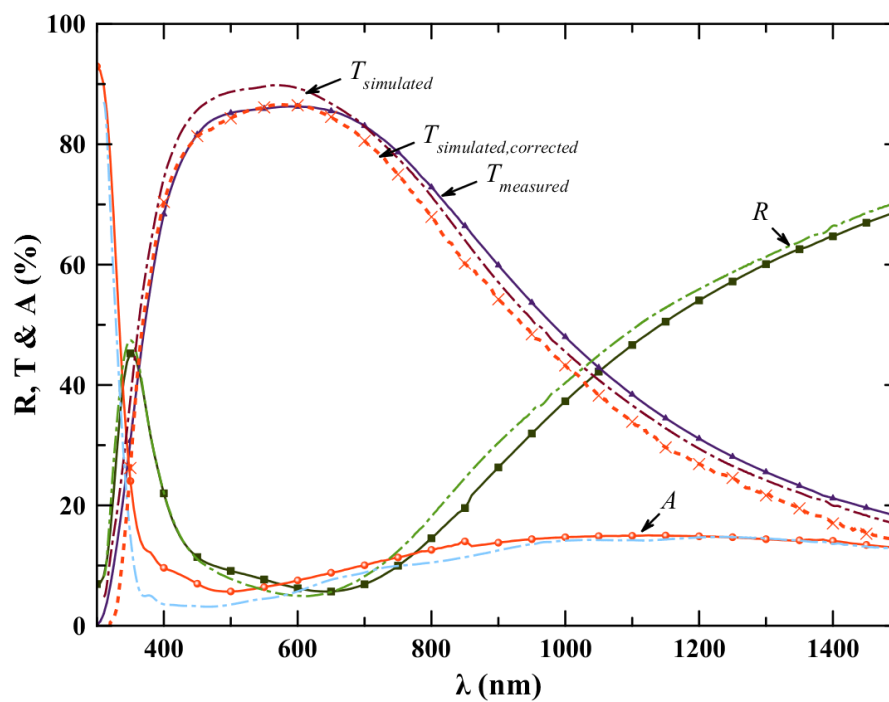

Figure S6 – Measured, simulated and corrected simulated optical properties (R, T & A) for the Glass | TiO<sub>x</sub> (37 nm) | Ag (13 nm) | TiO<sub>x</sub> (42 nm) sample (same as Figure S3 and S5) versus wavelength of the incident light.
